# Supplementary material
Source: ML conference proceedings conference paper supplement (https://proceedings.neurips.cc/paper_files/paper/2015/hash/6512bd43d9caa6e02c990b0a82652dca-Abstract.html)
Supplement: Supplementary file [file 6512bd43d9caa6e02c990b0a82652dca-Supplemental.zip]

---

# Algorithmic Stability and Uniform Generalization (Supplementary File)

---

**Ibrahim Alabdulmohsin**  
King Abdullah University of Science and Technology  
Thuwal 23955, Saudi Arabia  
ibrahim.alabdulmohsin@kaust.edu.sa

*Note: The references cited in this document are referred to by their numbers as cited in the original paper.*

## 1 Proof of Example 1

There are two approaches to prove the asymptotic expression for algorithmic stability. The first approach is to look into the impact of knowing  $H$  on the distribution of training examples  $Z_{trn}$ . The second (equivalent) approach is to look into the impact of a single training example  $Z_{trn}$  on the final distribution of the inferred hypothesis  $H$ . Here, we use the first approach because it is simpler.

First, the probability we obtain a hypothesis  $H = \frac{k}{m}$ , where  $k \in \{0, 1, \dots, m\}$ , given that we have  $m$  Bernoulli trials has a binomial distribution:

$$\mathbb{P}(H = \frac{k}{m}) = \binom{m}{k} \phi^k (1 - \phi)^{m-k}$$

We use the identity:

$$\begin{aligned} 1 - S(H; Z_{trn}) &= \|\mathbb{P}(H) \cdot \mathbb{P}(Z_{trn}), \mathbb{P}(H, Z_{trn})\|_{\mathcal{T}} \\ &= \sum_{k=0}^m \mathbb{P}(H = \frac{k}{m}) \|\mathbb{P}(Z_{trn}), \mathbb{P}(Z_{trn} | H)\|_{\mathcal{T}}, \end{aligned}$$

where, again,  $\|P, Q\|_{\mathcal{T}}$  is the total variation distance between the two probability distributions  $P$  and  $Q$ .

However,  $\mathbb{P}(Z_{trn})$  is Bernoulli with probability of success  $\phi$  while  $\mathbb{P}(Z_{trn} | H = \frac{k}{m})$  is Bernoulli with probability of success  $H$ . The total variation distance between the two Bernoulli distributions is given by  $|\phi - H|$ . So, we obtain:

$$1 - S(H; Z_{trn}) = \sum_{k=0}^m \binom{m}{k} \phi^k (1 - \phi)^{m-k} \left| \phi - \frac{k}{m} \right| \quad (1)$$

This is the *mean deviation*. Assuming  $\phi m$  is an integer, then the mean deviation of the binomial random variable is given by de Moivre's formula [22]:

$$MD = 2(1 - \phi)^{(1-\phi)m} \phi^{1+m\phi} (1 + m\phi) \binom{m}{m\phi + 1} \quad (2)$$

The mean deviation is maximized when  $\phi = \frac{1}{2}$ . This gives us:

$$\mathbb{S}(\mathcal{L}) = 1 - \frac{1}{2^m} \binom{m}{m/2 + 1} \sim 1 - \frac{1}{\sqrt{2\pi m}},$$

where in the last step we expanded the binomial coefficient and used Stirling's approximation [17].

## 2 Proof of Lemma 1

The proof consists of two steps. First, we show that  $S(A; (B, C)) = S(A; B)$ . To prove this, we note that:

$$\begin{aligned}
S(A; (B, C)) &= \sum_{A, B, C} \min \{ \mathbb{P}(A) \mathbb{P}(B, C), \mathbb{P}(A, B, C) \} \\
&= \sum_{A, B, C} \min \{ \mathbb{P}(A) \mathbb{P}(B) \mathbb{P}(C|B), \mathbb{P}(A, B) \mathbb{P}(C|A, B) \} \\
&= \sum_{A, B, C} \mathbb{P}(C|B) \min \{ \mathbb{P}(A) \mathbb{P}(B), \mathbb{P}(A, B) \} \\
&= \sum_{A, B} \min \{ \mathbb{P}(A) \mathbb{P}(B), \mathbb{P}(A, B) \} = S(A; B)
\end{aligned}$$

In the third line, we used the Markov property  $\mathbb{P}(C|B, A) = \mathbb{P}(C|B)$ .

Second, we show that  $S(A; (B, C)) \leq S(A; C)$  for any random variables  $A, B$  and  $C$ . This is the analog to the *information-cannot-hurt* inequality in information theory. We have by definition:

$$\begin{aligned}
S(A; (B, C)) &= \sum_{A, B, C} \min \{ \mathbb{P}(A) \mathbb{P}(B, C), \mathbb{P}(A, B, C) \} \\
&= \sum_A \mathbb{P}(A) \sum_{B, C} \min \{ \mathbb{P}(B, C), \mathbb{P}(B, C|A) \}
\end{aligned}$$

However, the minimum of the sums is always larger than the sum of minimums. That is:

$$\min \left\{ \sum_i \alpha_i, \sum_i \beta_i \right\} \geq \sum_i \min \{ \alpha_i, \beta_i \}$$

Using marginalization  $\mathbb{P}(X) = \sum_Y \mathbb{P}(X, Y)$  and the above inequality, we obtain:

$$\begin{aligned}
S(A; (B, C)) &= \sum_A \mathbb{P}(A) \sum_{B, C} \min \{ \mathbb{P}(B, C), \mathbb{P}(B, C|A) \} \\
&\leq \sum_A \mathbb{P}(A) \sum_C \min \left\{ \sum_B \mathbb{P}(B, C), \sum_B \mathbb{P}(B, C|A) \right\} \\
&= \sum_{A, C} \min \{ \mathbb{P}(A) \mathbb{P}(C), \mathbb{P}(A, C) \} = S(A; C)
\end{aligned}$$

Combining both results yields  $S(A; B) = S(A; (B, C)) \leq S(A; C)$ , which is the desired inequality.

## 3 Proof of Theorem 1

Let  $\mathcal{L} : \cup_{m=1}^{\infty} \mathcal{Z}^m \rightarrow \mathcal{H}$  be a learning algorithm that receives a finite set of training examples  $S_m = \{Z_i\}_{i=1, \dots, m} \in \mathcal{Z}^m$  drawn i.i.d. from a fixed unknown distribution  $\mathbb{P}(z)$ . Let  $H \sim \mathbb{P}_{\mathcal{L}}(h|S_m)$  be a random variable that stands for the hypothesis inferred by  $\mathcal{L}$ , and let  $Z_{trn} \sim S_m$  be a single random training example. To simplify notation, we will write  $F = L(\cdot; H) : \mathcal{Z} \rightarrow [0, 1]$  to denote the loss function whose dependence on  $H$  is implicit. Note that  $F$  is itself a random variable that satisfies the Markov chain  $S_m \rightarrow H \rightarrow F$ . The claim is that  $\mathcal{L}$  generalizes uniformly across all parametric loss functions  $F$  if and only if  $\mathcal{L}$  is algorithmically stable.

By the Markov property, we have  $\mathbb{P}(F|H, S_m) = \mathbb{P}(F|H)$ . By definition, the true and empirical risks are given by:

$$\begin{aligned}\hat{R}_{true} &= \mathbb{E}_{S_m} \mathbb{E}_{H|S_m} \mathbb{E}_{F|H} \mathbb{E}_{Z \sim \mathbb{P}(z)} F(Z) \\ &= \mathbb{E}_F \mathbb{E}_{Z \sim \mathbb{P}(z)} F(Z)\end{aligned}\tag{3}$$

$$\begin{aligned}\hat{R}_{emp} &= \mathbb{E}_{S_m} \mathbb{E}_{H|S_m} \mathbb{E}_{F|H} \mathbb{E}_{Z \sim S_m} F(Z) \\ &= \mathbb{E}_{S_m} \mathbb{E}_{F|S_m} \mathbb{E}_{Z \sim S_m} F(Z) \\ &= \mathbb{E}_F \mathbb{E}_{S_m|F} \mathbb{E}_{Z \sim S_m} F(Z)\end{aligned}\tag{4}$$

Because  $Z_{trn} \sim S_m$  is a random variable whose value is chosen uniformly at random with replacement from the training set  $S_m$ , its original distribution *prior to* observing  $F$  is the original distribution of observations  $\mathbb{P}(z)$ . Its *posterior* distribution after observation  $F$  is altered, however, because both  $F$  and  $Z_{trn}$  depend on the choice of the training set  $S_m$ . However, they are both *conditionally* independent of each other given  $S_m$ . By marginalization, we have:

$$\mathbb{P}(Z_{trn}|F) = \mathbb{E}_{S_m|F} \mathbb{P}(Z_{trn}|S_m, F) = \mathbb{E}_{S_m|F} \mathbb{P}(Z_{trn}|S_m)$$

Combining this with Eq. (3) and Eq. (4) yields:

$$\begin{aligned}\hat{R}_{true} &= \mathbb{E}_F \mathbb{E}_{Z_{trn}} F(Z_{trn}) \\ \hat{R}_{emp} &= \mathbb{E}_F \mathbb{E}_{Z_{trn}|F} F(Z_{trn}),\end{aligned}$$

where in the first line  $Z_{trn}$  is distributed according to its original distribution  $\mathbb{P}(z)$ . Both equations imply that:

$$\hat{R}_{true} - \hat{R}_{emp} = \mathbb{E}_F [\mathbb{E}_{Z_{trn}} F(Z_{trn}) - \mathbb{E}_{Z_{trn}|F} F(Z_{trn})]$$

Now, we would like to sandwich the right-hand side between upper and lower bounds. To do this, we note that if  $\mathbb{P}_1(z)$  and  $\mathbb{P}_2(z)$  are two distributions defined on the same alphabet  $\mathcal{Z}$  and  $F : \mathcal{Z} \rightarrow [0, 1]$  is a fixed bounded loss function, then:

$$\left| \mathbb{E}_{Z \sim \mathbb{P}_1(z)} F(Z) - \mathbb{E}_{Z \sim \mathbb{P}_2(z)} F(Z) \right| \leq \|\mathbb{P}_1(z), \mathbb{P}_2(z)\|_{\mathcal{T}},$$

where  $\|P, Q\|_{\mathcal{T}}$  is the total variation distance. The proof to this result can be immediately deduced by considering the two regions  $\{z \in \mathcal{Z} : \mathbb{P}_1(z) > \mathbb{P}_2(z)\}$  and  $\{z \in \mathcal{Z} : \mathbb{P}_1(z) < \mathbb{P}_2(z)\}$  separately. In addition, it is tight because the inequality holds with equality for the loss function  $F(z) = \mathbb{I}\{\mathbb{P}_1(z) \geq \mathbb{P}_2(z)\}$ .

Using the last result, we deduce the inequality:

$$|\hat{R}_{true} - \hat{R}_{emp}| \leq 1 - S(F; Z_{trn})$$

Finally, from the data processing inequality, we have  $S(H; Z_{trn}) \leq S(F; Z_{trn})$ . Plugging this into the earlier inequality yields the bound:

$$\begin{aligned}|\hat{R}_{true} - \hat{R}_{emp}| &\leq 1 - S(H; Z_{trn}) \\ &\leq 1 - \mathbb{S}(\mathcal{L})\end{aligned}$$

This proves that if  $\mathcal{L}$  is algorithmically stable, i.e.  $\mathbb{S}(\mathcal{L}) \rightarrow 1$  as  $m \rightarrow \infty$ , then  $|\hat{R}_{true} - \hat{R}_{emp}|$  converge to zero uniformly across all parametric loss functions. Therefore, algorithmic stability is sufficient for uniform generalization.

To prove that algorithmic stability is also necessary for uniform generalization, let  $\delta > 0$  be some fixed positive constant and let  $\mathbb{P}_\delta(z)$  be a distribution of observations that achieves  $S(H; Z_{trn}) < \mathbb{S}(\mathcal{L}) + \delta$ , where  $\mathbb{S}(\mathcal{L})$  is the algorithmic stability defined in the paper. Of course, such a probability distribution  $\mathbb{P}_\delta(z)$  always exists by definition of the infimum in Definition 5. Next, let  $L_\delta(\cdot; H) : \mathcal{Z} \rightarrow [0, 1]$  be a parametric loss that is given by:

$$\begin{aligned}L_\delta(z; H) &= \mathbb{I}\{\mathbb{P}_\delta(Z_{trn} = z) \geq \mathbb{P}_\delta(Z_{trn} = z | H)\} \\ &= \mathbb{I}\{\mathbb{P}_\delta(Z_{trn} = z) \geq \mathbb{E}_{S_m|H} \mathbb{P}_{Z_{trn} \sim S_m}(Z_{trn} = z)\}\end{aligned}$$

The loss  $L_\delta(\cdot; H)$  is independent of the training set given  $H$  because  $\mathbb{P}_\delta(Z_{trn} = z | H)$  is evaluated by taking expectation over all possible training sets given  $H$ . In addition, the loss function is parametric; it has a bounded range  $L_\delta(\cdot; H) : \mathcal{Z} \rightarrow [0, 1]$  and satisfies the Markov chain  $S_m \rightarrow H \rightarrow L_\delta(\cdot; H)$ . However, given this choice of parametric loss, we have:

$$\begin{aligned}
& |R_{true}(\mathcal{L}) - R_{emp}(\mathcal{L})| \\
&= \mathbb{E}_H [\mathbb{E}_{Z_{trn}} \mathbb{I}\{\mathbb{P}_\delta(Z_{trn}) > \mathbb{P}_\delta(Z_{trn} | H)\} - \mathbb{E}_{Z_{trn} | H} \mathbb{I}\{\mathbb{P}_\delta(Z_{trn}) > \mathbb{P}_\delta(Z_{trn} | H)\}] \\
&= \mathbb{E}_H \sum_{Z_{trn}} [\mathbb{P}(Z_{trn}) - \mathbb{P}(Z_{trn} | H)] \cdot \mathbb{I}\{\mathbb{P}(Z_{trn}) > \mathbb{P}(Z_{trn} | H)\} \\
&= \mathbb{E}_H [\|\mathbb{P}(Z_{trn}) - \mathbb{P}(Z_{trn} | H)\|_{\mathcal{T}}] = 1 - S(Z_{trn}, H) \\
&\geq 1 - \mathbb{S}(\mathcal{L}) - \delta
\end{aligned}$$

In the last line, we used the fact that  $S(Z_{trn}; H) \leq \mathbb{S}(\mathcal{L}) - \delta$  when observations are distributed according to  $\mathbb{P}_\delta(z)$ . Hence, for any  $\delta > 0$ , there exists a distribution and a parametric loss function such that:

$$1 - \mathbb{S}(\mathcal{L}) - \delta \leq |R_{true}(\mathcal{L}) - R_{emp}(\mathcal{L})| \leq 1 - \mathbb{S}(\mathcal{L})$$

Therefore, algorithmic stability is also necessary for uniform generalization.

## 4 Proof of Theorem 2

Because  $\mathcal{Z}$  is countable, we will assume without loss of generality that  $\mathcal{Z} = \{1, 2, 3, \dots\}$ , and we will write  $p_z = \mathbb{P}(Z_{trn} = z)$  to denote the prior (original) distribution of observations. Since all lazy learners are equivalent, we will look into the lazy learner whose hypothesis  $H$  is itself the entire training set  $S_m$  up to a permutation. Let  $m_z$  denote the number of times  $z \in \mathcal{Z}$  was observed in the training set. Note that  $\mathbb{P}(Z_{trn} = z | H) = \mathbb{P}_{S_m}(z)$ , and so  $S(H; Z_{trn}) = 1 - \mathbb{E}_{S_m} [\|\mathbb{P}(z), \mathbb{P}_{S_m}(z)\|_{\mathcal{T}}]$ .

We have:

$$\mathbb{P}(H) = \mathbb{P}(S_m) = \binom{m}{m_1, m_2, \dots} p_1^{m_1} p_2^{m_2} \dots$$

Here,  $\binom{\cdot}{\cdot}$  is the multinomial coefficient. Using the relation  $\langle \mathbb{P}(X), \mathbb{P}(Y) \rangle = 1 - \frac{1}{2} \|\mathbb{P}(X) - \mathbb{P}(Y)\|_1$ , we obtain:

$$\begin{aligned}
S(H; Z_{trn}) &= 1 - \frac{1}{2} \mathbb{E}_H [\|\mathbb{P}(Z_{trn}) - \mathbb{P}(Z_{trn} | H)\|_1] \\
&= 1 - \frac{1}{2} \times \sum_{k=1,2,3,\dots} \sum_{m_1+m_2+\dots=m} \binom{m}{m_1, m_2, \dots} \times p_1^{m_1} p_2^{m_2} \dots \left| \frac{m_k}{m} - p_k \right|
\end{aligned}$$

For the inner summation, we write:

$$\begin{aligned}
& \sum_{m_1+m_2+\dots=m} \binom{m}{m_1, m_2, \dots} p_1^{m_1} p_2^{m_2} \dots \left| \frac{m_k}{m} - p_k \right| \\
&= \sum_{s=0}^m \binom{m}{s} p_k^s \left| \frac{m_k}{m} - p_k \right| \times \\
& \quad \sum_{m_1+\dots+m_{k-1}+m_{k+1}+\dots=m-s} \binom{m-s}{m_1, \dots, m_{k-1}, m_{k+1}, \dots} \times p_1^{m_1} \dots p_{k-1}^{m_{k-1}} p_{k+1}^{m_{k+1}} \dots
\end{aligned}$$

Using the multinomial series, we simplify the right-hand side into:

$$\sum_{s=0}^m \binom{m}{s} p_k^s (1 - p_k)^{m-s} \left| \frac{s}{m} - p_k \right|$$

Now, we use *De Moivre's formula* for the mean deviation of the binomial random variable (see the proof of Example 1). This gives us:

$$\begin{aligned} \sum_{m_1+m_2+\dots=m} \binom{m}{m_1, m_2, \dots} p_1^{m_1} p_2^{m_2} \dots \left| \frac{s}{m} - p_k \right| \\ = \sum_{s=0}^m \binom{m}{s} p_k^s (1-p_k)^{m-s} \left| \frac{s}{m} - p_k \right| \\ = \frac{2}{m} (1-p_k)^{(1-p_k)m} p_k^{1+mp_k} \frac{m!}{(p_k m)! ((1-p_k)m-1)!} \end{aligned}$$

Using *Stirling's approximation* to the factorial [17], we obtain the simple asymptotic expression:

$$\sum_{m_1+m_2+\dots=m} \binom{m}{m_1, m_2, \dots} p_1^{m_1} p_2^{m_2} \dots \left| \frac{m_k}{m} - p_k \right| \sim \sqrt{\frac{2p_k(1-p_k)}{\pi m}}$$

Plugging this into the earlier expression for  $S(H; Z_{trn})$  yields:

$$\begin{aligned} S(H; Z_{trn}) &\sim 1 - \frac{1}{2} \sum_{k=1,2,3,\dots} \sqrt{\frac{2p_k(1-p_k)}{\pi m}} \\ &= 1 - \sqrt{\frac{\mathbf{Ess}[\mathcal{Z}; \mathbb{P}(z)] - 1}{2\pi m}} \end{aligned}$$

Due to the tightness of the Stirling approximation, the asymptotic expression for mutual stability is tight. Because  $S(H; Z_{trn}) = 1 - \mathbb{E}_{S_m} \|\mathbb{P}(z), \mathbb{P}_{S_m}(z)\|_{\mathcal{T}}$ , we deduce that:

$$\mathbb{E}_{S_m} \|\mathbb{P}(z), \mathbb{P}_{S_m}(z)\|_{\mathcal{T}} \sim \sqrt{\frac{\mathbf{Ess}[\mathcal{Z}; \mathbb{P}(z)] - 1}{2\pi m}},$$

which provides the asymptotic rate of convergence of an empirical probability mass function to the true distribution.

## 5 Proof of Theorem 4

Let  $c_H(z) = \mathbb{I}\{\mathbb{P}(Z_{trn} = z|H) \geq \mathbb{P}(Z_{trn} = z)\}$ . We have:

$$\mathbb{S}(\mathcal{L}) = \inf_{\mathbb{P}(z)} S(H; Z_{trn}) = \inf_{\mathbb{P}(z)} \left\{ \mathbb{E}_H \sum_{z \in \mathcal{Z}} \min\{\mathbb{P}(Z_{trn} = z), \mathbb{P}(Z_{trn} = z|H)\} \right\} \quad (5)$$

$$= \inf_{\mathbb{P}(z)} \left\{ 1 - \mathbb{E}_H \sum_{z \in \mathcal{Z}} (\mathbb{P}(Z_{trn} = z|H) - \mathbb{P}(Z_{trn} = z)) \cdot c_H(z) \right\} \quad (6)$$

$$= 1 - \sup_{\mathbb{P}(z)} \left\{ \mathbb{E}_H \sum_{z \in \mathcal{Z}} (\mathbb{P}(Z_{trn} = z|H) - \mathbb{P}(Z_{trn} = z)) \cdot c_H(z) \right\} \quad (7)$$

$$= 1 - \sup_{\mathbb{P}(z)} \left\{ \mathbb{E}_{S_m} \mathbb{E}_{H|S_m} [\mathbb{E}_{Z \sim \mathbb{P}(z)} c_H(Z) - \mathbb{E}_{Z \sim S_m} c_H(Z)] \right\} \quad (8)$$

$$\geq 1 - \sup_{\mathbb{P}(z)} \left\{ \mathbb{E}_{S_m} \mathbb{E}_{H|S_m} |\mathbb{E}_{Z \sim \mathbb{P}(z)} c_H(Z) - \mathbb{E}_{Z \sim S_m} c_H(Z)| \right\} \quad (9)$$

$$\geq 1 - \sup_{\mathbb{P}(z)} \left\{ \mathbb{E}_{S_m} \sup_{h \in \mathcal{H}} |\mathbb{E}_{Z \sim \mathbb{P}(z)} c_h(Z) - \mathbb{E}_{Z \sim S_m} c_h(Z)| \right\} \quad (10)$$

Next, we note that the quantity inside the expectation in (10) can be bounded using uniform convergence. In particular, we use the following bound, which holds for any distribution  $\mathbb{P}(z)$  if  $m > d_{VC}(\mathcal{C}) + 1$ <sup>1</sup>:

$$\mathbb{E}_{S_m} \sup_{h \in \mathcal{H}} |\mathbb{E}_{Z \sim \mathbb{P}(z)} c_h(Z) - \mathbb{E}_{Z \sim S_m} c_h(Z)| \leq \frac{4 + \sqrt{d_{VC}(\mathcal{C}) (1 + \log(2m))}}{\sqrt{2m}}$$

<sup>1</sup>A proof of this bound is in Eq. 6.4 and Lemma 6.10 in the textbook “*Understanding Machine Learning: From Theory to Algorithms*” by Shai Shalev-Shwartz and Shai Ben-David, 2014.
